# Supplementary material for: A high-solid DES pretreatment using never-dried biomass as the starting material: towards high-quality lignin fractionation
Source: Royal Society of Chemistry journal article supplement (doi:10.1039/d2gc04595h), 2023-01-01
Supplement: d2gc04595h1.pdf [file d2gc04595h1.pdf]

**Supporting information for:**

**A high-solid DES pretreatment using never-dried biomass as the  
starting material: towards high-quality lignin fractionation**

Jinyuan Cheng<sup>a</sup>, Chen Huang<sup>a,\*</sup>, Yunni Zhan<sup>a</sup>, Xuze Liu<sup>a</sup>, Jia Wang<sup>b</sup>, Xianzhi Meng<sup>c</sup>,

Chang Geun Yoo<sup>f</sup>, Guigan Fang<sup>a</sup>, Arthur J. Ragauskas<sup>c,d,e,\*</sup>

<sup>a</sup>Institute of Chemical Industry of Forest Products, Chinese Academy of Forestry,

Jiangsu Province Key Laboratory of Biomass Energy and Materials, Nanjing 210042

<sup>b</sup>Co-Innovation Center for Efficient Processing and Utilization of Forest Resources,

Nanjing Forestry University, Nanjing 210037, China

<sup>c</sup>Department of Chemical and Biomolecular Engineering, University of Tennessee

Knoxville, Knoxville, TN 37996, USA.

<sup>d</sup>Department of Forestry, Wildlife, and Fisheries, Center for Renewable Carbon, The

University of Tennessee Institute of Agriculture, Knoxville, TN 37996, USA.

<sup>e</sup>Joint Institute for Biological Science, Biosciences Division, Oak Ridge National

Laboratory, Oak Ridge, TN 37831, USA.

<sup>f</sup>Department of Paper and Bioprocess Engineering, State University of New York

College of Environmental Science and Forestry, Syracuse, New York 13210-2781,

United States.

**Table S1.** The lignin recovery yield based on the lignin removal, and the sugars analysis of recovered lignins.

| Substrates water contents<br>(%)/Solid:DES (w:w) | Lignin recovery<br>yield (%) | Glucose<br>(%) | Xylose<br>(%) | Arabinose<br>(%) |
|--------------------------------------------------|------------------------------|----------------|---------------|------------------|
| 10                                               | 96.1                         | 0              | 0             | 0                |
| 20                                               | 98.4                         | 0              | 0             | 0                |
| 30                                               | 97.4                         | 0              | 0             | 0                |
| 40                                               | 91.4                         | 0              | 0.1           | 0                |
| 50                                               | 93.1                         | 0              | 0             | 0                |
| 60                                               | 97.7                         | 0              | 0             | 0                |
| 1 : 2                                            | 96.4                         | 0              | 0             | 0                |
| 1 : 4                                            | 97.1                         | 0              | 0             | 0                |
| 1 : 6                                            | 95.5                         | 0              | 0             | 0                |
| 1 : 8                                            | 94.1                         | 0              | 0.1           | 0                |
| 1 : 10                                           | 95.1                         | 0              | 0             | 0                |

**Table S2.** Quantification of CEL and recovered Lignin (results expressed as per 100 Ar).

| Sample      | $\beta$ - $\beta$ (%) | $\beta$ -5 (%) | FA (%) | PCE (%) |
|-------------|-----------------------|----------------|--------|---------|
| CEL         | 4                     | 5              | 6      | 25      |
| L10% (1:4)  | 3                     | 4              | 0      | 39      |
| L20% (1:4)  | 3                     | 6              | 1      | 35      |
| L40% (1:4)  | 3                     | 8              | 1      | 30      |
| L60% (1:4)  | 3                     | 6              | 1      | 28      |
| L60% (1:10) | 2                     | 7              | 1      | 34      |

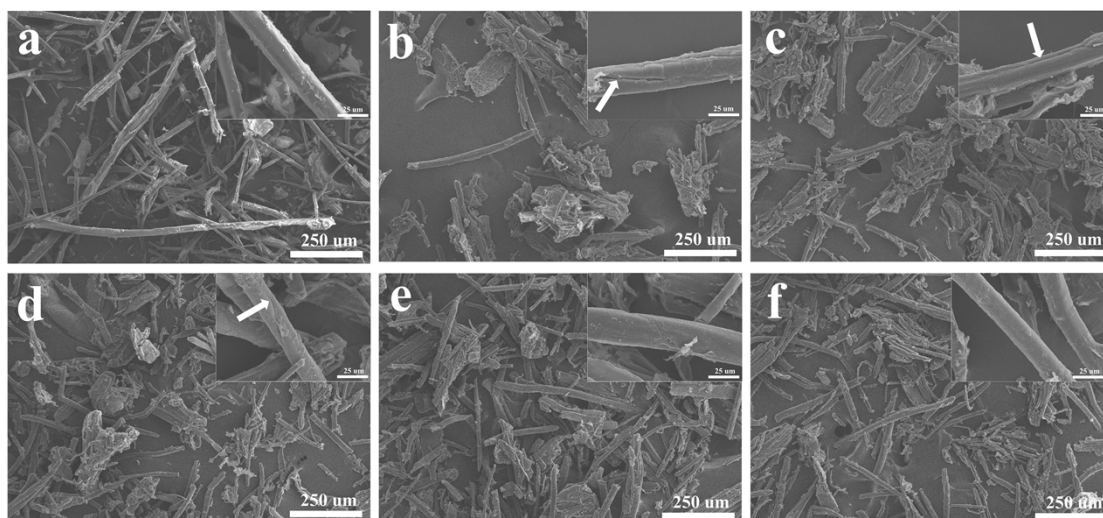

**Fig. S1.** SEM images of the original (a) and the pretreated feedstocks under different water contents of 20% (b), 30% (c), 40% (d), 50% (e), and 60% (f).

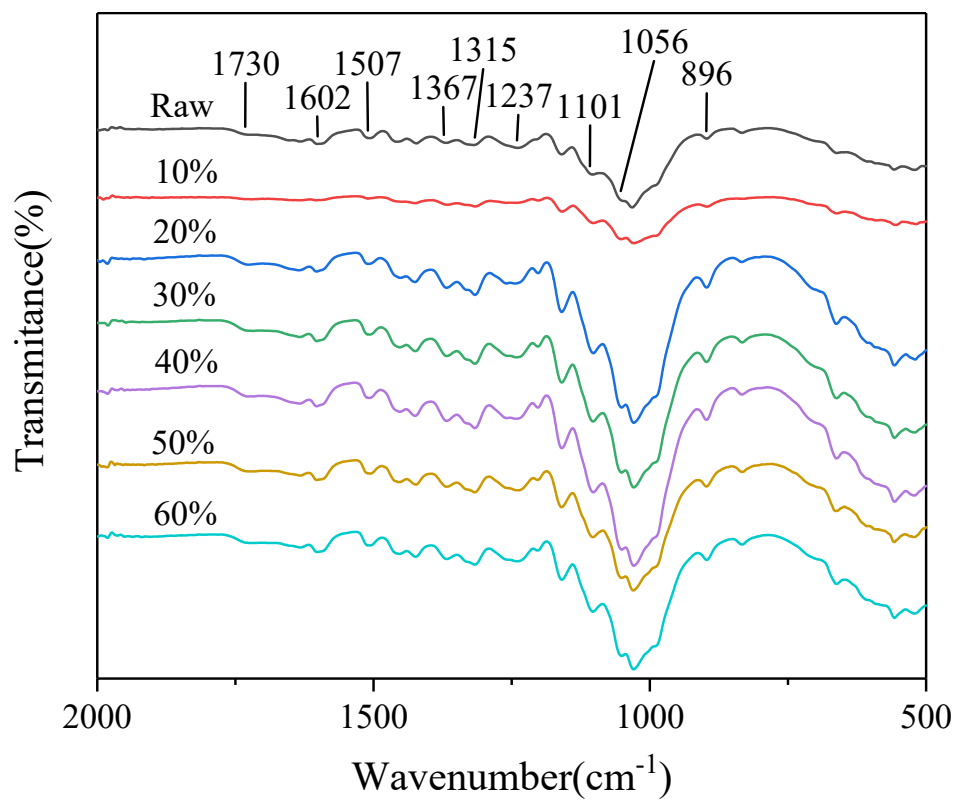

**Fig. S2.** FTIR analysis of raw and pretreated substrates under different substrates water content.

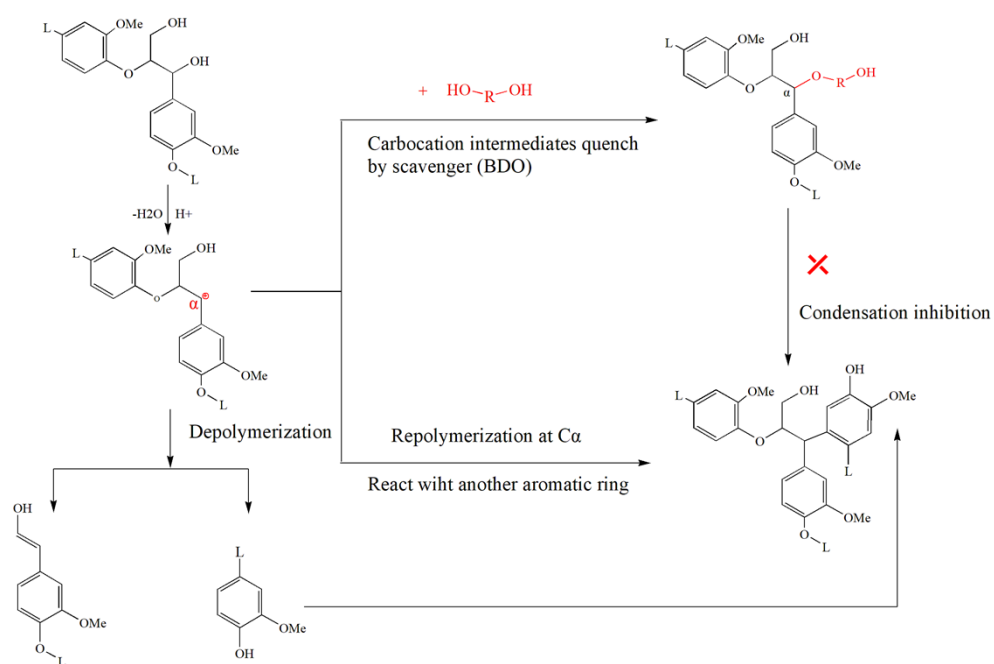

**Fig. S3.** Lignin extraction in normal case, and the lignin protection by our 1,4-BDO.

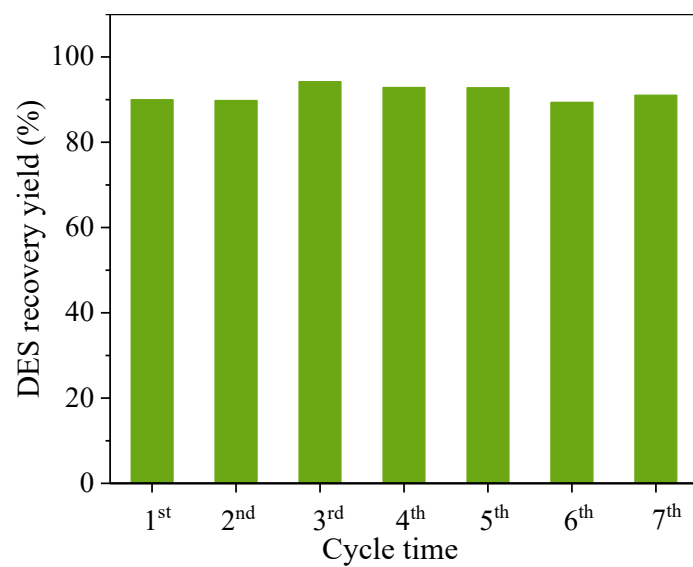

**Fig. S4.** DES recovery yield under different pretreatment cycles.
